# Supplementary material
Source: PubMed Central journal article supplement (PMC6138242)
Supplement: NIHMS78732-supplement-2.pdf [file NIHMS78732-supplement-2.pdf]

## Supplementary table 1

| GR <sup>Ncr1-iCre</sup> vs<br>WT <sup>Ncr1-iCre</sup><br>spleen NK cells | log2 Fold<br>Change | P-value     |
|--------------------------------------------------------------------------|---------------------|-------------|
| GeneSymbol                                                               |                     |             |
| Nr3c1                                                                    | -1,433531108        | 1,51038E-23 |
| Tsc22d3                                                                  | -1,085385169        | 2,72678E-13 |
| Pdcd1                                                                    | -1,074943918        | 2,23849E-08 |

| GR <sup>Ncr1-iCre</sup> vs<br>WT <sup>Ncr1-iCre</sup><br>liver NK cells | log2 Fold<br>Change | P-value     |
|-------------------------------------------------------------------------|---------------------|-------------|
| GeneSymbol                                                              |                     |             |
| Nr3c1                                                                   | -1,121209556        | 4,0542E-18  |
| Tsc22d3                                                                 | -1,060277042        | 2,49147E-25 |
| Rhpn1                                                                   | 1,155356202         | 4,47434E-21 |

| GR <sup>Ncr1-iCre</sup> vs<br>WT <sup>Ncr1-iCre</sup><br>liver ILC1s | log2 Fold<br>Change | P-value     |
|----------------------------------------------------------------------|---------------------|-------------|
| GeneSymbol                                                           |                     |             |
| Fam129b                                                              | -1,977043159        | 2,04623E-06 |
| Kcnn4                                                                | -1,837239359        | 7,19661E-06 |
| Cdkn3                                                                | -1,763882303        | 2,12219E-07 |
| Itgam                                                                | -1,741094428        | 8,01755E-06 |
| Adamts14                                                             | -1,679270793        | 0,000111585 |
| Gzmk                                                                 | -1,653282416        | 0,000190511 |
| Nhs12                                                                | -1,615848136        | 2,50582E-05 |
| mt-Co3                                                               | -1,59935198         | 0,000235044 |
| Parpbp                                                               | -1,596274988        | 0,000259624 |
| Klf2                                                                 | -1,563861954        | 0,000208621 |
| mt-Atp6                                                              | -1,520830342        | 0,000461334 |
| Gtsf1                                                                | -1,468129404        | 0,000955369 |
| Prr11                                                                | -1,467986918        | 0,000384995 |
| Serp1b8                                                              | -1,449069232        | 0,001048676 |
| Ccnb2                                                                | -1,44274613         | 0,000420451 |
| Cep72                                                                | -1,424174181        | 0,000608144 |
| Ube2c                                                                | -1,396840046        | 0,001196171 |
| Srsf12                                                               | -1,387045692        | 0,001726964 |
| Aldh2                                                                | -1,371406912        | 0,000496704 |
| Gm10171                                                              | -1,356365874        | 0,001706172 |
| Emilin2                                                              | -1,338831095        | 0,002194396 |
| mt-Atp8                                                              | -1,336636808        | 0,001960195 |
| Rab3il1                                                              | -1,330787587        | 0,001902059 |
| Trim16                                                               | -1,307887545        | 0,002656772 |
| Fbxl2                                                                | -1,307131406        | 0,003100646 |
| Cma1                                                                 | -1,300356889        | #N/A        |
| Ccl9                                                                 | -1,300116826        | 0,001300224 |
| Gpx3                                                                 | -1,293674868        | 0,003400714 |

| GR <sup>Ncr1-iCre</sup> vs<br>WT <sup>Ncr1-iCre</sup><br>liver ILC1s | log2 Fold<br>Change | P-value     |
|----------------------------------------------------------------------|---------------------|-------------|
| Kif22                                                                | -1,291353142        | 0,000936831 |
| Cmk1r1                                                               | -1,286924932        | 0,002348703 |
| Aspm                                                                 | -1,285619766        | 0,003429606 |
| Lockd                                                                | -1,262541134        | 0,000315505 |
| F830016B08Rik                                                        | -1,260574756        | 0,003685322 |
| 2210011C24Rik                                                        | -1,253672583        | 0,004747334 |
| Hist1h2ad                                                            | -1,2401941          | 0,005131748 |
| Vim                                                                  | -1,238511181        | 2,02648E-05 |
| Mafb                                                                 | -1,220224893        | 0,005912701 |
| Scimp                                                                | -1,210274033        | 0,000580799 |
| Plk1                                                                 | -1,210213181        | 0,006022971 |
| Sell                                                                 | -1,209471045        | 0,002638185 |
| Sphk1                                                                | -1,207548411        | 0,006600893 |
| mt-Co2                                                               | -1,207214974        | 0,006315805 |
| Emilin1                                                              | -1,205161897        | 0,0060829   |
| Sort1                                                                | -1,18968478         | 0,007327976 |
| Gm43305                                                              | -1,186838894        | 0,003030804 |
| Ptgs2                                                                | -1,186376459        | 0,007215593 |
| Nectin4                                                              | -1,182123956        | 0,007833577 |
| Hmmr                                                                 | -1,180070662        | 0,007435037 |
| Birc5                                                                | -1,170978863        | 0,001587966 |
| Snx30                                                                | -1,170362699        | 0,005838968 |
| Kbtbd11                                                              | -1,160479634        | 0,003326613 |
| Tmem171                                                              | -1,159972252        | 0,006361001 |
| Mxd3                                                                 | -1,159416267        | 0,00482674  |
| Hist1h2ak                                                            | -1,158193829        | 0,007136563 |
| Fgf13                                                                | -1,158025021        | 0,005613221 |
| B4gal16                                                              | -1,155210092        | 0,006259632 |
| Rasgrp2                                                              | -1,154724974        | 0,006280075 |
| mt-Nd3                                                               | -1,141004509        | 0,009195537 |
| Usp2                                                                 | -1,140729635        | 0,005007358 |
| Large1                                                               | -1,137438402        | 0,01049078  |
| Rap1gap2                                                             | -1,126786722        | 0,009346793 |
| Gm7582                                                               | -1,126352044        | 0,011216695 |
| Cdca8                                                                | -1,124907151        | 0,001346837 |
| Ap1nr                                                                | -1,121054433        | 0,01050537  |
| S1pr5                                                                | -1,116140073        | 0,011851815 |
| Id3                                                                  | -1,115476121        | 0,003390615 |
| Zeb2                                                                 | -1,106580128        | 0,003023315 |
| Padi4                                                                | -1,10223583         | 0,013120596 |
| Rec8                                                                 | -1,097279812        | 0,012701462 |
| Gdf15                                                                | -1,095789146        | 0,012311307 |
| Klf3                                                                 | -1,087570629        | 0,003857801 |
| Arhgap32                                                             | -1,08687081         | 0,008566296 |
| Kif23                                                                | -1,085461695        | 0,014614426 |
| Cdca3                                                                | -1,080989402        | 0,007507187 |
| Tpx2                                                                 | -1,080307559        | 0,008863325 |
| Nrgn                                                                 | -1,077111445        | 0,002907539 |
| Tcf7l2                                                               | -1,074439814        | 0,015596562 |
| Cntrob                                                               | -1,071922337        | 0,010115547 |
| Hist1h2ap                                                            | -1,071675422        | 0,015476351 |

| GR <sup>Ncr1-iCre</sup> vs<br>WT <sup>Ncr1-iCre</sup><br>liver ILC1s | log2 Fold<br>Change | P-value     |
|----------------------------------------------------------------------|---------------------|-------------|
| Tnfrsf12                                                             | -1,070511046        | 0,014050916 |
| Gm26517                                                              | -1,067996043        | 0,013278362 |
| Camk1d                                                               | -1,066610974        | 0,004463772 |
| E2f2                                                                 | -1,066255452        | 0,013982299 |
| Slc37a2                                                              | -1,062190697        | 0,006829362 |
| Igkv14-111                                                           | -1,060793602        | #N/A        |
| Cdc20                                                                | -1,058655178        | 0,014842072 |
| Adam15                                                               | -1,054350562        | 0,017561393 |
| Pfkfb4                                                               | -1,049765578        | 0,014170745 |
| Sowahc                                                               | -1,045834757        | 0,017255294 |
| Il11ra1                                                              | -1,044007364        | 0,014413635 |
| Dock7                                                                | -1,036294252        | 0,019106102 |
| Vcan                                                                 | -1,035816483        | 0,019544348 |
| Hist1h2ag                                                            | -1,03514861         | 0,012274379 |
| Fgd6                                                                 | -1,034063766        | 0,017896379 |
| Cx3cl1                                                               | -1,02888231         | 0,020190096 |
| 2210408F21Rik                                                        | -1,028277707        | 0,019638969 |
| Tars12                                                               | -1,027615707        | 0,02018097  |
| Fam64a                                                               | -1,025888131        | 0,020565123 |
| Slc25a37                                                             | -1,025033794        | 0,009131031 |
| Bicd1                                                                | -1,019453222        | 0,021335307 |
| Itgb5                                                                | -1,019231867        | 0,021292056 |
| Nusap1                                                               | -1,016885322        | 0,018386127 |
| Hist1h1d                                                             | -1,016792587        | 0,002129499 |
| C1qa                                                                 | -1,016245368        | 0,022254141 |
| Nlrc4                                                                | -1,014670746        | 0,021507516 |
| Lrp4                                                                 | -1,012008341        | 0,018278566 |
| Amigo3                                                               | -1,011623106        | 0,006860877 |
| Kif4                                                                 | -1,011073086        | 0,022829121 |
| Gm14173                                                              | -1,010079635        | 0,022063978 |
| Naaa                                                                 | -1,008317854        | 0,020845385 |
| Klrb1a                                                               | -1,00672618         | 0,001290108 |
| Erdr1                                                                | -1,004831703        | 0,02379144  |
| Synj2                                                                | -1,000324903        | 0,02431832  |
| Ints6l                                                               | -1,000312296        | 0,015363219 |
| Ccl22                                                                | 2,312991016         | 1,39563E-07 |
| Gm24447                                                              | 1,687290328         | 0,000129387 |
| Igkv10-94                                                            | 1,571254712         | 0,00022052  |
| Gm15583                                                              | 1,413826511         | 0,000535346 |
| Jmy                                                                  | 1,259174758         | 0,001014409 |
| Tdo2                                                                 | 1,246474252         | 0,003058257 |
| Rps18-ps3                                                            | 1,20311002          | 0,000153677 |
| Arrdc3                                                               | 1,136860936         | 0,000338652 |
| Fgl1                                                                 | 1,136405882         | 0,01056578  |
| Gm14323                                                              | 1,0897578           | 0,009616589 |
| Rbp4                                                                 | 1,085627808         | 0,010920163 |
| Crp                                                                  | 1,06827564          | 0,010111668 |
| Fgg                                                                  | 1,051666992         | 0,017822361 |
| Gm5641                                                               | 1,048470747         | 0,016960656 |
| 6720464F23Rik                                                        | 1,038672261         | 0,0194171   |
| Kng1                                                                 | 1,037651416         | 0,019532619 |

### Supplementary Table 1: Transcripts differentially expressed between GR<sup>Ncr1-iCre</sup> and WT<sup>Ncr1-iCre</sup>

spleen and liver NK cells and liver ILC1s upon MCMV infection. Spleen NK cells (red),

liver NK cells (green) and liver ILC1s (blue) were sorted from GR<sup>Ncr1-iCre</sup> and WT<sup>Ncr1-iCre</sup> mice 44h

PI. A pairwise comparison of gene expression between GR-deficient and GR-sufficient cells was

performed for each subset using DESeq2, which uses the Wald test for significance testing.  $n=3$

samples GR<sup>Ncr1-iCre</sup> versus 3 WT<sup>Ncr1-iCre</sup> samples, for each subset.
